# Supplementary material
Source: PubMed Central journal article supplement (PMC5140710)
Supplement: NIHMS808630-supplement-Supplemental_Digital_Content.pdf [file NIHMS808630-supplement-Supplemental_Digital_Content.pdf]

## SUPPLEMENTARY MATERIAL

### Sequence Cleanup and Bioinformatics Analysis

The procedure of the bioinformatics pipeline consists of the following steps:

1. Baseline quality control: instrument quality (q) scores are used to remove reads that are too short ( $\leq 50$  bp), have too many ( $\geq 8$  bases with  $q \leq 15$ ) low quality bases, and to mask all bases with low scores with 'N' characters.
2. Error correction: reads from step 1 are aligned to the corresponding amplicon reference sequence (HXB2) using a codon-level extension to the Smith-Waterman local alignment algorithm, which directly accounts for frameshift errors caused by homopolymer length miscalls – the most common error modality for the 454 platform. Pairwise alignments are merged into a global alignment of all reads, so that each base is mapped to a consistent system of genomic coordinates. Remaining sequencing errors are modeled as a mixture of multinomial distributions, and all individual single nucleotide variants, which cannot be reliably assigned to non-error multinomial components (posterior probability  $> 0.999$ , assumed error rate  $\leq 0.5\%$ ) are reverted to position consensus.
3. Extraction of common and representative reads: because the median read length is  $>50\%$  of the length of sequenced amplicons, we performed simple clustering of error-corrected reads, where two reads were merged in the same cluster if (a) they did not differ except in positions where one of the sequences had an error-induced 'gap'; (b) they matched at X or more nucleotide positions, where X is the maximum of 100 half of the median read length. Each cluster was represented by its consensus sequence, and by the number of reads assigned to the cluster.
4. Recombination screening: we screened all sets of representative reads from step 3 for evidence of recombination using GARD [1]. Note that because step 4 does not rely on the assumption that all reads are related by a single phylogeny, it will not be adversely affected by the presence of recombinants.

The pipeline is available at <https://github.com/veg/HIV-NGS>

**Table Suppl.1.** Summary of the Algorithm for Computing the Estimated Date of HIV-1 Infection.

Adapted from [2].

| <b>Class</b>                                                                                                                                                                                                                                                                                                                                                                    | <b>Definitions for stage of HIV-1 infection</b>                                                                                                                                                                                                                                          |
|---------------------------------------------------------------------------------------------------------------------------------------------------------------------------------------------------------------------------------------------------------------------------------------------------------------------------------------------------------------------------------|------------------------------------------------------------------------------------------------------------------------------------------------------------------------------------------------------------------------------------------------------------------------------------------|
| <b>A1.0</b>                                                                                                                                                                                                                                                                                                                                                                     | If there is a first positive RNA† and negative enzyme immunoassay (EIA) within 7 days of the first positive RNA, and no prior positive/indeterminate western blot (WB), then EDI = first positive RNA date – 11 days. (~Fiebig Stages I-II‡)                                             |
| <b>A2.0</b>                                                                                                                                                                                                                                                                                                                                                                     | If there is an indeterminate WB within 7 days of the first positive RNA, then EDI = first positive RNA date – 20 days. (~Fiebig Stages III-IV‡)                                                                                                                                          |
| <b>A3.0</b>                                                                                                                                                                                                                                                                                                                                                                     | If the last negative EIA or negative/indeterminate WB occurred ≤ 30 days before the first positive WB (with associated positive RNA), then EDI = midpoint of the positive WB date and the negative EIA or negative/indeterminate WB date (earlier of two) – 19 days. (~Fiebig Stage IV‡) |
| <b>A3.1</b>                                                                                                                                                                                                                                                                                                                                                                     | If the first positive WB p31/32 band is absent, then EDI = first positive WB date – 89 days. (~Fiebig Stage V‡)                                                                                                                                                                          |
| <b>E1.0A</b>                                                                                                                                                                                                                                                                                                                                                                    | If there is a detuned EIA (dtEIA) consistent with infection of ~3 mo within 30 days of the first positive WB and CD4 count > 200 or CD4% > 14 within 30 days of the first positive WB, then EDI = first dtEIA date – 70 days§. (Fiebig VI‡)                                              |
| <b>E1.0B</b>                                                                                                                                                                                                                                                                                                                                                                    | If there is a dtEIA consistent with infection of ~3-6 mo within 30 days of the first positive WB and CD4 count > 200 or CD4% > 14), then EDI = first dtEIA date – 133 days§. (Fiebig VI‡)                                                                                                |
| <b>E1.0C</b>                                                                                                                                                                                                                                                                                                                                                                    | If there is a dtEIA consistent with infection of ~6-12 mo within 30 days of the first positive WB and CD4 count > 200 or CD4% > 14, then EDI = first dtEIA date – 170 days§. (Fiebig VI‡)                                                                                                |
| <b>E2.0</b>                                                                                                                                                                                                                                                                                                                                                                     | If there is a first positive WB and a negative EIA within 365 days participant enrollment (Day 0), then EDI = midpoint between the last negative EIA and Day 0. (Fiebig VI‡)                                                                                                             |
| <p>* Each rule applied sequentially until EDI criteria satisfied.<br/>           † Positive RNA was defined as a NAT/viral load exceeding the detectable level for a given assay.<br/>           ‡ Indexed to algorithm from Fiebig <i>et al.</i> [3]. Note: no endpoint was defined for stage VI by Fiebig.<br/>           § dtEIA threshold from Kothe <i>et al.</i> [4].</p> |                                                                                                                                                                                                                                                                                          |

**Table Suppl.2. Next Generation Sequencing Characteristics**

| ID     | Cpt  | Time Points | Time from EDI (in days) | Nb of Haplotypes | Genome Coverage | Nb of Reads |
|--------|------|-------------|-------------------------|------------------|-----------------|-------------|
| S1     | BP   | 1           | 20                      | 17               | 1656            | 2533        |
|        | PBMC | 1           |                         | 16               | 1682.5          | 2205        |
|        | SP   | 1           |                         | 26               | 2462            | 12527       |
|        | BP   | 2           | 48                      | 15               | 1690            | 2663        |
|        | BP   | 3           | 104                     | 5                | 2689            | 2802        |
|        | PBMC | 3           |                         | 7                | 815             | 1094        |
| SP     | 3    | 39          |                         | 7332             | 8810            |             |
| S2     | BP   | 1           | 87                      | 45               | 4774            | 5140        |
|        | SP   | 1           |                         | 33               | 4639            | 5358        |
|        | SP   | 2           | 227                     | 23               | 4687            | 4843        |
|        | BP   | 3           | 248                     | 46               | 5562.5          | 5945        |
|        | BP   | 4           | 289                     | 10               | 769             | 870         |
|        | SP   | 4           |                         | 2                | 1367            | 1823        |
|        | PBMC | 5           | 2096                    | 20               | 1798            | 1875        |
| S3     | BP   | 1           | 84                      | 27               | 3356.5          | 3458        |
|        | BP   | 2           |                         | 19               | 1767.5          | 1919        |
|        | PBMC | 2           | 98                      | 20               | 1745            | 1963        |
|        | SP   | 2           |                         | 33               | 3306.5          | 3726        |
|        | BP   | 3           |                         | 23               | 1579            | 1731        |
|        | BP   | 4           | 182                     | 15               | 873             | 1012        |
|        | SP   | 4           | 37                      | 37               | 4023            | 4203        |
| BP     | 5    | 5           |                         | 563.5            | 832             |             |
| S4     | BP   | 1           | 40                      | 19               | 2223.5          | 2473        |
|        | PBMC | 1           |                         | 17               | 3096            | 3321        |
|        | SP   | 1           |                         | 31               | 2287            | 2573        |
|        | BP   | 2           | 42                      | 26               | 6674.5          | 6992        |
|        | BP   | 3           | 47                      | 4                | 1683            | 4886        |
|        | SP   | 3           |                         | 22               | 2748            | 3003        |
|        | BP   | 4           | 75                      | 10               | 754             | 1230        |
|        | SP   | 4           | 118                     | 10               | 879             | 1274        |
| BP     | 5    | 5           |                         | 563.5            | 832             |             |
| PBMC   | 5    | 13          | 1293                    | 1441             |                 |             |
| S5     | BP   | 1           | 77                      | 34               | 4184.5          | 4326        |
|        | PBMC | 1           |                         | 24               | 1807            | 1893        |
|        | SP   | 1           |                         | 21               | 2480            | 2692        |
|        | BP   | 2           | 162                     | 24               | 2326            | 3936        |
|        | SP   | 2           | 254                     | 28               | 11863           | 13611       |
|        | BP   | 3           |                         | 29               | 2787            | 2982        |
| SP     | 3    | 5           | 596                     | 1272             |                 |             |
| S6     | BP   | 1           | 169                     | 50               | 3869.5          | 5342        |
|        | BP   | 2           |                         | 31               | 1936            | 2041        |
|        | PBMC | 2           | 177                     | 12               | 1520            | 1925        |
|        | SP   | 2           |                         | 17               | 1603            | 2032        |
|        | BP   | 3           |                         | 26               | 1831            | 1978        |
|        | BP   | 4           | 288                     | 42               | 3351            | 4180        |
|        | BP   | 5           | 457                     | 12               | 686             | 824         |
|        | SP   | 5           |                         | 34               | 6538.5          | 12309       |
|        | BP   | 6           | 514                     | 15               | 1148            | 1313        |
|        | PBMC | 7           | 762                     | 15               | 850             | 948         |
| median |      | 4.5         | 218                     | 21               | 1884            | 2553        |
| mean   |      | 4.5         | 586                     | 22               | 2711            | 3503        |

Cpt: Compartment; EDI: Estimated date of infection; Nb: Number; BP: Blood Plasma; SP: Seminal Plasma; PBMC: Peripheral Blood Mononuclear Cells

**Table Suppl.3. Sites under positive and selective pressure by compartment**

| Subject | Positive Selection |      |                | Purifying Selection |      |                |
|---------|--------------------|------|----------------|---------------------|------|----------------|
|         | Blood plasma       | PBMC | Seminal plasma | Blood plasma        | PBMC | Seminal plasma |
| S1      | 2.                 | 3.   | 2.             | 4.                  | 3.   | 4.             |
| S2      | 6.                 | 0.   | 5.             | 7.                  | 3.   | 3.             |
| S3      | 3.                 | 4.   | 4.             | 4.                  | 3.   | 4.             |
| S4      | 3.                 | 1.   | 2.             | 7.                  | 5.   | 4.             |
| S5      | 3.                 | 2.   | 5.             | 5.                  | 0.   | 3.             |
| S6      | 4.                 | 4.   | 4.             | 16.                 | 4.   | 5.             |

Sites under selective pressure were assessed across compartment for each participants with the Fast Unconstrained Bayesian AppRoximation (FUBAR) program [5].

**Table Suppl.4. Markov Jump Counts Summary**

| Subject | Markov Jump Count [95%HPD] | ME From BP [95%HPD], (%) | ME From BP to SP, No. (%) | ME From BP to PBMC, No. (%) |
|---------|----------------------------|--------------------------|---------------------------|-----------------------------|
| S1      | 52.9 [41-63]               | 43.4 [35-58], (82)       | 27.2 (62.6)               | 16.2 (37.4)                 |
| S2      | 22.8 [17-28]               | 13.0 [6-18], (57)        | 12.1 (93.1)               | 0.8 (6.9)                   |
| S3      | 29.0 [22-36]               | 27.1 [20-34], (93.4)     | 13.7 (50.6)               | 13.4 (49.4)                 |
| S4      | 64.8 [53-77]               | 60.5 [46-75], (93.3)     | 31.8 (52.6)               | 28.6 (47.3)                 |
| S5      | 43.7 [35-51]               | 41.4 [33-50], (94.7)     | 21.9 (52.9)               | 19.5 (47.1)                 |
| S6      | 23.6 [18-29]               | 22.4 [16-27], (94.9)     | 7.0 (31.2)                | 15.4 (68.8)                 |
| Mean    | 39.5                       | 34.6 (85.9)              | 18.9 (57.2)               | 15.7 (42.8)                 |

ME: Migration events; BP: Blood Plasma; SP: Seminal Plasma; 95%HPD: highest posterior density intervals at 95%.

**Table Suppl.5 Cytokines quantification in seminal plasma at baseline**

| ID | IL-6  | MCP-1/CCL2 | RANTES/CCL5 | IFN-gamma | IP-10/CXCL10 | TNF-alpha |
|----|-------|------------|-------------|-----------|--------------|-----------|
| S1 | 43.6  | 2175.8     | 324.1       | 109.4     | 44532.4      | 2.1       |
| S2 | 1.3   | 1577.9     | 508.4       | 321.6     | 615464.2     | 0.5       |
| S3 | 32.2  | 605.6      | 292.4       | 3.2       | 34033.4      | 7.1       |
| S4 | 7.4   | 2222.1     | 558.2       | 177.9     | 353660.1     | 4.7       |
| S5 | 355.5 | 570.3      | 251.7       | 160.5     | 36247.3      | 37.1      |
| S6 | 79.4  | 2601.4     | 677.4       | 107.8     | 148871.9     | 9.3       |

MCP-1: monocyte chemotactic protein; IL-6: interleukin; TNF-  $\alpha$ : tumor necrosis factor; Interferon- $\gamma$ , RANTES: regulated on activation normal T cell expressed and secreted; IP-10: Interferon- $\gamma$  induced protein.

**Table Suppl.6. Human Herpes Virus copies/ml in seminal plasma at baseline (Log<sub>10</sub>).**

| ID | HSV-1 | HSV-2 | CMV  | EBV  | HHV6 | HHV7 |
|----|-------|-------|------|------|------|------|
| S1 | 0.00  | 0.00  | 0.00 | 0.00 | 3.52 | 0.00 |
| S2 | 0.00  | 0.00  | 0.00 | 2.77 | 0.00 | 0.00 |
| S3 | 0.00  | 3.34  | 5.37 | 4.34 | 0.00 | 0.00 |
| S4 | 0.00  | 0.00  | 0.00 | 0.00 | 0.00 | 0.00 |
| S5 | 3.00  | 0.00  | 5.74 | 0.00 | 0.00 | 0.00 |
| S6 | 0.00  | 0.00  | 7.38 | 3.70 | 0.00 | 0.00 |

HSV-1: Herpes Simplex Virus 1; HSV-2: Herpes Simplex Virus 2; CMV: Cytomegalovirus; EBV: Epstein Barr Virus; HHV-6: Human Herpes Virus 6; HHV-7: Human Herpes Virus 7.

**Figure Suppl.1. Virological characteristics and sampling for the 6 individuals.**

For each individual, top plots indicate the evolution of HIV RNA levels (in red) and semen (in blue) and CD4 T cell count (in black). Bottom plots indicate the timing of blood plasma (red), seminal plasma (blue) and PBMC (green) sampling.



**FIGURE Suppl.1 Virological characteristics and sampling for the 6 individuals**

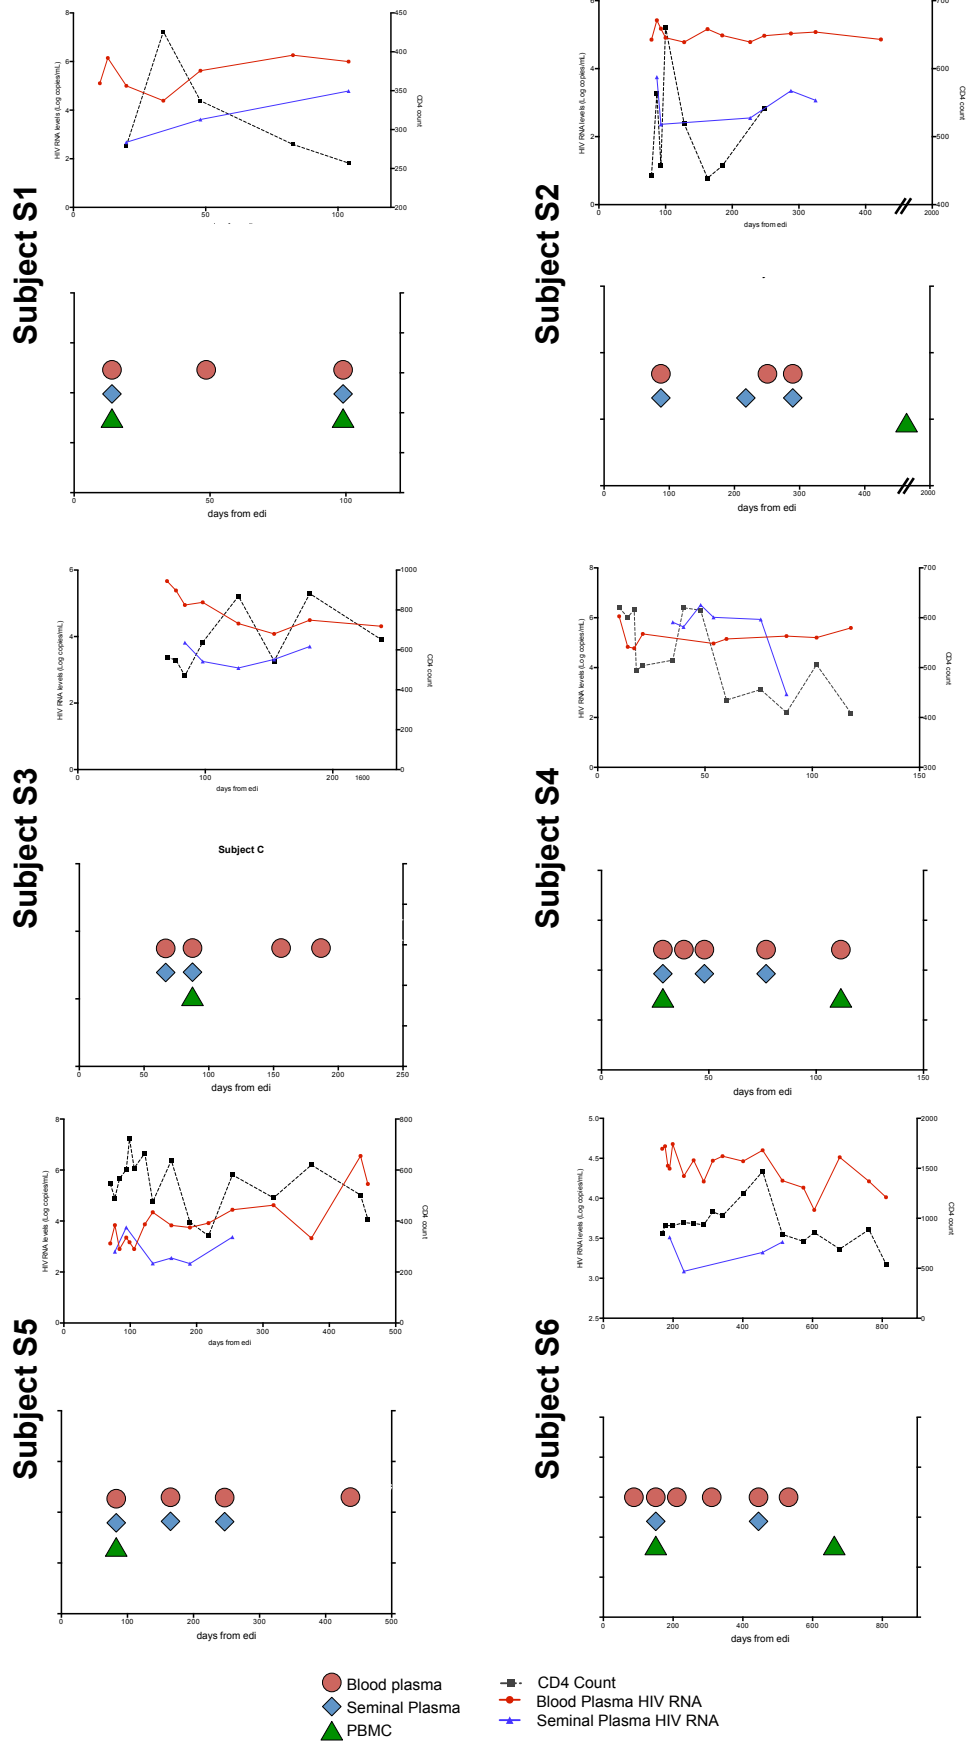

**Figure Suppl.2. Env nucleotide diversity in blood plasma and seminal plasma derived viral populations.** The mean of all pairwise Tamura-Nei 93 distances between reads with at least 100 overlapping base pairs was computed to measure the mean pairwise diversity [6] (2). Blood and seminal plasma samples are colored in red and blue respectively.



## REFERENCES

1. Kosakovsky Pond SL, Posada D, Gravenor MB, Woelk CH, Frost SDW. GARD: a genetic algorithm for recombination detection. *Bioinformatics (Oxford, England)* 2006,**22**:3096-3098.
2. Le T, Wright EJ, Smith DM, He W, Catano G, Okulicz JF, *et al.* Enhanced CD4+ T-cell recovery with earlier HIV-1 antiretroviral therapy. *The New England journal of medicine* 2013,**368**:218-230.
3. Fiebig EW, Wright DJ, Rawal BD, Garrett PE, Schumacher RT, Peddada L, *et al.* Dynamics of HIV viremia and antibody seroconversion in plasma donors: implications for diagnosis and staging of primary HIV infection. *AIDS (London, England)* 2003,**17**:1871-1879.
4. Kothe D, Byers RH, Caudill SP, Satten GA, Janssen RS, Hannon WH, *et al.* Performance characteristics of a new less sensitive HIV-1 enzyme immunoassay for use in estimating HIV seroincidence. *Journal of acquired immune deficiency syndromes (1999)* 2003,**33**:625-634.
5. Murrell B, Moola S, Mabona A, Weighill T, Sheward D, Kosakovsky Pond SL, *et al.* FUBAR: A Fast, Unconstrained Bayesian AppRoximation for Inferring Selection. *Molecular Biology and Evolution* 2013,**30**:1196-1205.
6. Tamura K. Estimation of the number of nucleotide substitutions when there are strong transition-transversion and G+C-content biases. *Molecular Biology and Evolution* 1992,**9**:678-687.
